# Supplementary material for: Economic evaluation of the hospitalist care model in an acute medical unit: a benefit–cost analysis
Source: HighWire-hosted journal article supplement (doi:10.1136/bmjopen-2023-081594), 2024-07-01
Supplement: bmjopen-2023-081594supp002_data_supplement.pdf [file bmjopen-2023-081594supp002_data_supplement.pdf]

**Supplementary 2.** Type of costs, cost estimation formula and data source

| Type of costs                                                | Cost estimation formula & data source                                                                                                                                                                                                                                                                                                                                                                                                                    |
|--------------------------------------------------------------|----------------------------------------------------------------------------------------------------------------------------------------------------------------------------------------------------------------------------------------------------------------------------------------------------------------------------------------------------------------------------------------------------------------------------------------------------------|
| Direct costs                                                 | $C1 + C2 + C3 + C4$                                                                                                                                                                                                                                                                                                                                                                                                                                      |
| Direct medical costs                                         | C1                                                                                                                                                                                                                                                                                                                                                                                                                                                       |
| Total medical expense in hospitalization (C1)                | Individual medical treatment bill receipt (real data)<br>① consultation fee<br>② admission fee<br>③ medication fee<br>(including medication / injection / anesthesia / WB and blood product)<br>④ treatment and surgery fee<br>⑤ medical examintaion fee<br>(including inspection / medical imaging / CT / MRI / PET / Ultrasonography)<br>⑥ therapeutic materials<br>⑦ the others (prosthetics, orthodontics / rehab and physiotherapy / psychotherapy) |
| Direct non-medical costs                                     | $C2 + C3 + C4$                                                                                                                                                                                                                                                                                                                                                                                                                                           |
| Family caregiver transportation fare in hospitalization (C2) | $\$19 * LOS$<br>2017 Korea health panel study / 2019 Annual report on the consumer price index (referenced data), LOS : real data                                                                                                                                                                                                                                                                                                                        |
| Paid care cost in hospitalization (C3)                       | $\$53 * LOS$<br>The Social Cost of Informal Nursing Care and its Policy Implications for Integrated Nursing and Care Services (2021)(referenced data), LOS : real data                                                                                                                                                                                                                                                                                   |
| Doctor's labor cost (C4)                                     |                                                                                                                                                                                                                                                                                                                                                                                                                                                          |
| Resident's labor costs (day shift)                           | 2017 resident training environment evaluation survey results                                                                                                                                                                                                                                                                                                                                                                                             |
| Salary after tax                                             | $\$26,760 \sim \$35,935$ , average salary after tax : $\$30,851$                                                                                                                                                                                                                                                                                                                                                                                         |
| Resident's labor costs per doctor                            | $\$37,350 \sim \$52,669$                                                                                                                                                                                                                                                                                                                                                                                                                                 |
|                                                              | Estimating using 4 Major SIS's (Social Insurance Schemes; national pension, health insurance, employment insurance, workers' compensation insurance) and tax (income tax and resident tax)                                                                                                                                                                                                                                                               |
| Resident's average labor costs per doctor                    | $\$44,180$                                                                                                                                                                                                                                                                                                                                                                                                                                               |
| Number of inpatient per day per doctor                       | 17                                                                                                                                                                                                                                                                                                                                                                                                                                                       |
| Number of inpatients per year per doctor                     | $17 * 365 = 6,205$                                                                                                                                                                                                                                                                                                                                                                                                                                       |
| Total number of resident assigned to the NHG group           | Total patient days of NHG group (45,196) / Number of inpatients per year per doctor (6,205) = 7.3                                                                                                                                                                                                                                                                                                                                                        |
| Total Resident's labor costs in the in the NHG group         | $\$44,180 * 7.3 = \$322,514$                                                                                                                                                                                                                                                                                                                                                                                                                             |
| Resident's labor costs per patient per day in the NHG group  | $\$322,514 / 45,196 = \$7$                                                                                                                                                                                                                                                                                                                                                                                                                               |
| Resident's labor costs per patient in the NHG group          | $\$7 * LOS$ per admission                                                                                                                                                                                                                                                                                                                                                                                                                                |
| Resident's labor costs (night shift)                         | 2017 resident training environment evaluation survey results                                                                                                                                                                                                                                                                                                                                                                                             |
| Number of inpatient per day per doctor                       | 41.8                                                                                                                                                                                                                                                                                                                                                                                                                                                     |
| Number of inpatients per year per doctor                     | $41.8 * 365 = 15,257$                                                                                                                                                                                                                                                                                                                                                                                                                                    |
| Total number of resident assigned to the NHG group           | Total patient days of NHG group (45,196) / Number of inpatients per year per doctor (15,257) = 2.96 (3)                                                                                                                                                                                                                                                                                                                                                  |

| Type of costs                                                        | Cost estimation formula & data source                                                                                                                                                                                                                                                                                                                                                                                                                                                                                                                 |
|----------------------------------------------------------------------|-------------------------------------------------------------------------------------------------------------------------------------------------------------------------------------------------------------------------------------------------------------------------------------------------------------------------------------------------------------------------------------------------------------------------------------------------------------------------------------------------------------------------------------------------------|
| Total Resident's labor costs in the in the NHG group                 | $\$44,180 \times 3 = \$132,540$                                                                                                                                                                                                                                                                                                                                                                                                                                                                                                                       |
| Resident's labor costs per patient per day in the NHG group          | $\$132,540 / 45,196 = \$3$                                                                                                                                                                                                                                                                                                                                                                                                                                                                                                                            |
| Resident's labor costs per patient in the NHG group                  | $\$3 \times \text{LOS per admission}$                                                                                                                                                                                                                                                                                                                                                                                                                                                                                                                 |
| Specialist's labor costs (day shift)                                 | 2017 Specialist salary evaluation survey results                                                                                                                                                                                                                                                                                                                                                                                                                                                                                                      |
| Specialist's average labor costs per doctor                          | average \$115,452                                                                                                                                                                                                                                                                                                                                                                                                                                                                                                                                     |
| Number of average inpatient per day per doctor                       | 5                                                                                                                                                                                                                                                                                                                                                                                                                                                                                                                                                     |
| Number of inpatients per year per doctor                             | $5 \times 365 = 1825$                                                                                                                                                                                                                                                                                                                                                                                                                                                                                                                                 |
| Total number of specialist assigned to the NHG group                 | Total patient days of the control group $(45,196) / 1825 = 45196 / 1825 = 24.7$                                                                                                                                                                                                                                                                                                                                                                                                                                                                       |
| Total specialist's labor costs in the NHG group                      | $\$115,452 \times 24.7 = \$2,851,664$                                                                                                                                                                                                                                                                                                                                                                                                                                                                                                                 |
| Specialist's labor costs per patient per day in the NHG group        | $\$2,851,664 / 45196 \text{ (total patient days)} = \$63$                                                                                                                                                                                                                                                                                                                                                                                                                                                                                             |
| Specialist's labor costs per patient in the NHG group                | $\$63 \times \text{LOS per admission}$                                                                                                                                                                                                                                                                                                                                                                                                                                                                                                                |
| Hospitalist's labor costs (day shift)                                | A study on the implementation and the evaluation of Korean hospitalist system to improve the quality of hospitalization (phase 2)(2018)                                                                                                                                                                                                                                                                                                                                                                                                               |
| Hospitalist's labor costs per doctor                                 | average \$115452                                                                                                                                                                                                                                                                                                                                                                                                                                                                                                                                      |
| Total number of hospitalist assigned to the HG group                 | 4                                                                                                                                                                                                                                                                                                                                                                                                                                                                                                                                                     |
| Hospitalist's labor costs per patient per day of AMU in the HG group | $\$461,808 / 7216 \text{ (Total AMU-LOS)} = \$64$                                                                                                                                                                                                                                                                                                                                                                                                                                                                                                     |
| Doctor's labor cost per patient in the HG group                      |                                                                                                                                                                                                                                                                                                                                                                                                                                                                                                                                                       |
| 1) No referral patients                                              | $(\$64 + \$3) \times \text{AMU-LOS}$                                                                                                                                                                                                                                                                                                                                                                                                                                                                                                                  |
| 2) Referral patients                                                 | $(\$64 + \$3) \times \text{AMU-LOS} + (\$63 + \$7 + \$3) \times \text{referral medical ward-LOS}$                                                                                                                                                                                                                                                                                                                                                                                                                                                     |
| Indirect Costs                                                       | $C5 + C6 + C7 + C8$                                                                                                                                                                                                                                                                                                                                                                                                                                                                                                                                   |
| Family caregiver productivity loss according to LOS (C5)             | $\$106 \times \text{LOS}$                                                                                                                                                                                                                                                                                                                                                                                                                                                                                                                             |
| Patient productivity loss according to ED-LOS (C6)                   | 2017 Survey report on labor conditions by employment type (referenced data), LOS (real data)<br>Hourly wage * ED-LOS * labor force participation rate (age, gender)                                                                                                                                                                                                                                                                                                                                                                                   |
| Patient productivity loss according to LOS (C7)                      | 2017 Survey report on labor conditions by employment type (referenced data)<br>2017 Annual report on the the economically active population survey (referenced data), ED-LOS (real data)<br>Daily wage * LOS * labor force participation rate (age, gender)                                                                                                                                                                                                                                                                                           |
| Patient productivity loss according to IHM (C8)                      | 2017 Survey report on labor conditions by employment type (referenced data)<br>2017 Annual report on the the economically active population survey (referenced data)<br>Annual wage * deceased patients' expected LYGs * labor force participation rate (age, gender)<br>Statistics Korea. LIFE TABLES FOR KOREA, 2017 (referenced data)<br>2017 Survey report on labor conditions by employment type (referenced data)<br>2017 Annual report on the the economically active population survey (referenced data)<br>In hospital mortality (real data) |

HG, hospitalist group; NHG, non-hospitalist group; AMU, acute medical unit; LOS, length of hospital stay; ED, emergency department; Cost unit: USD (\$1= 1307.9 KRW, year: 2023)
