# Supplementary material for: Economic evaluation of the hospitalist care model in an acute medical unit: a benefit–cost analysis
Source: HighWire-hosted journal article supplement (doi:10.1136/bmjopen-2023-081594), 2024-07-01
Supplement: bmjopen-2023-081594supp003_data_supplement.pdf [file bmjopen-2023-081594supp003_data_supplement.pdf]

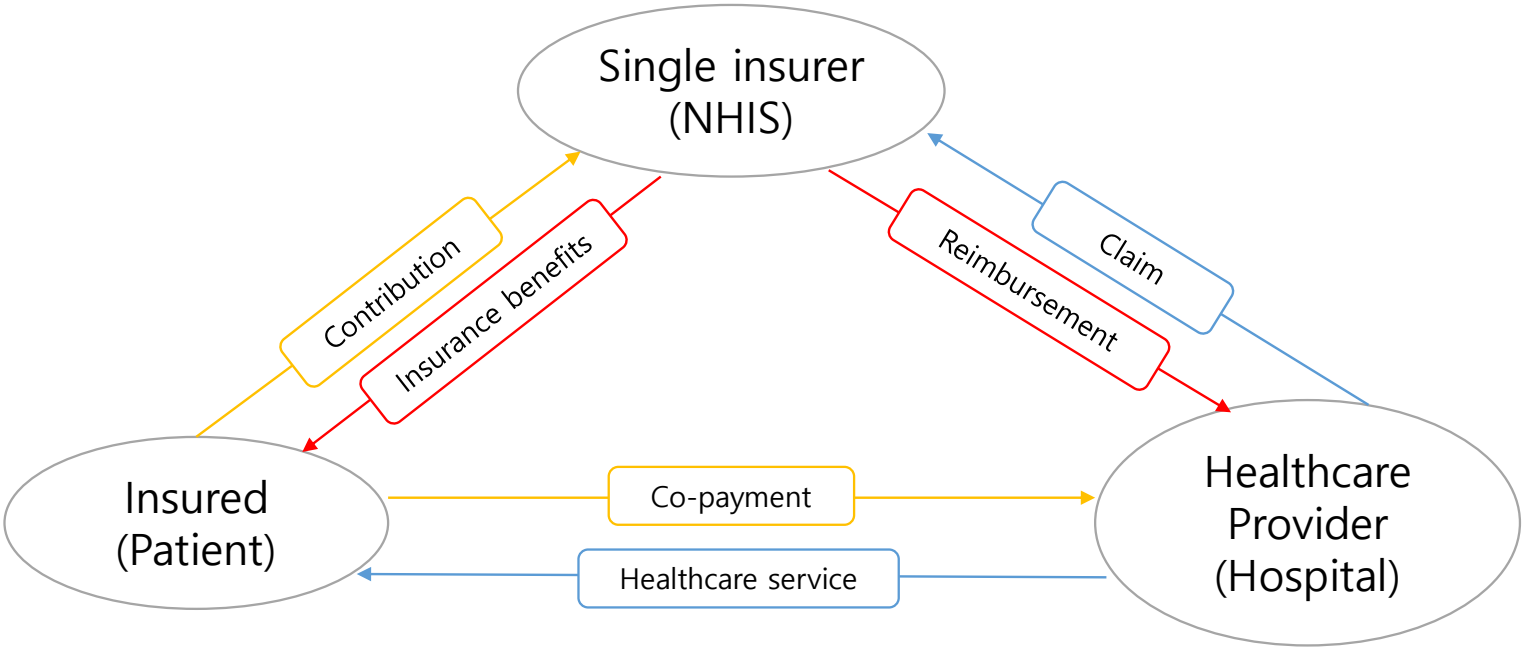

Supplementary 3. Governance of National Health Insurance in South Korea

Reproduced from (<https://www.nhis.or.kr/english/wbheaa02300m01.do>)
