# Supplementary material for: Economic evaluation of the hospitalist care model in an acute medical unit: a benefit–cost analysis
Source: HighWire-hosted journal article supplement (doi:10.1136/bmjopen-2023-081594), 2024-07-01
Supplement: bmjopen-2023-081594supp011_data_supplement.pdf [file bmjopen-2023-081594supp011_data_supplement.pdf]

(Cost unit : United States dollars)

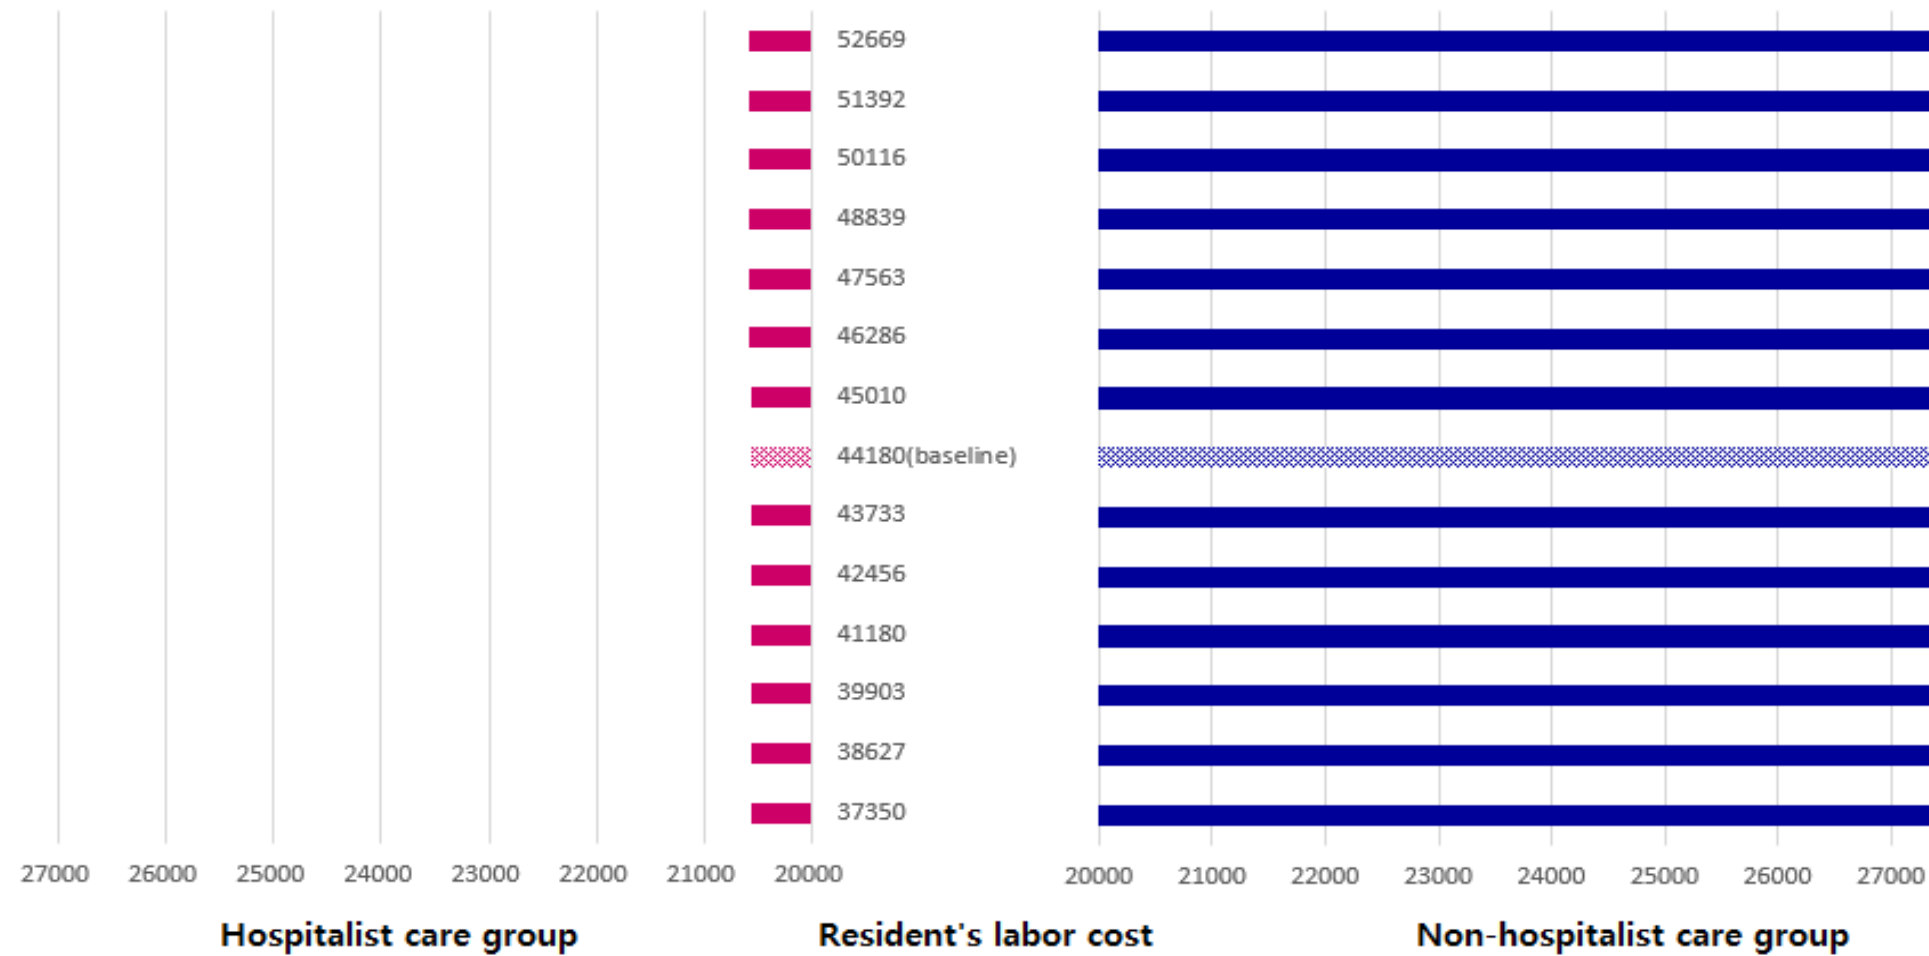

Total cost according to resident labor cost

Supplementary 11. One-way sensitivity analysis for the resident labor cost
