# Supplementary material for: Economic evaluation of the hospitalist care model in an acute medical unit: a benefit–cost analysis
Source: HighWire-hosted journal article supplement (doi:10.1136/bmjopen-2023-081594), 2024-07-01
Supplement: bmjopen-2023-081594supp013_data_supplement.pdf [file bmjopen-2023-081594supp013_data_supplement.pdf]

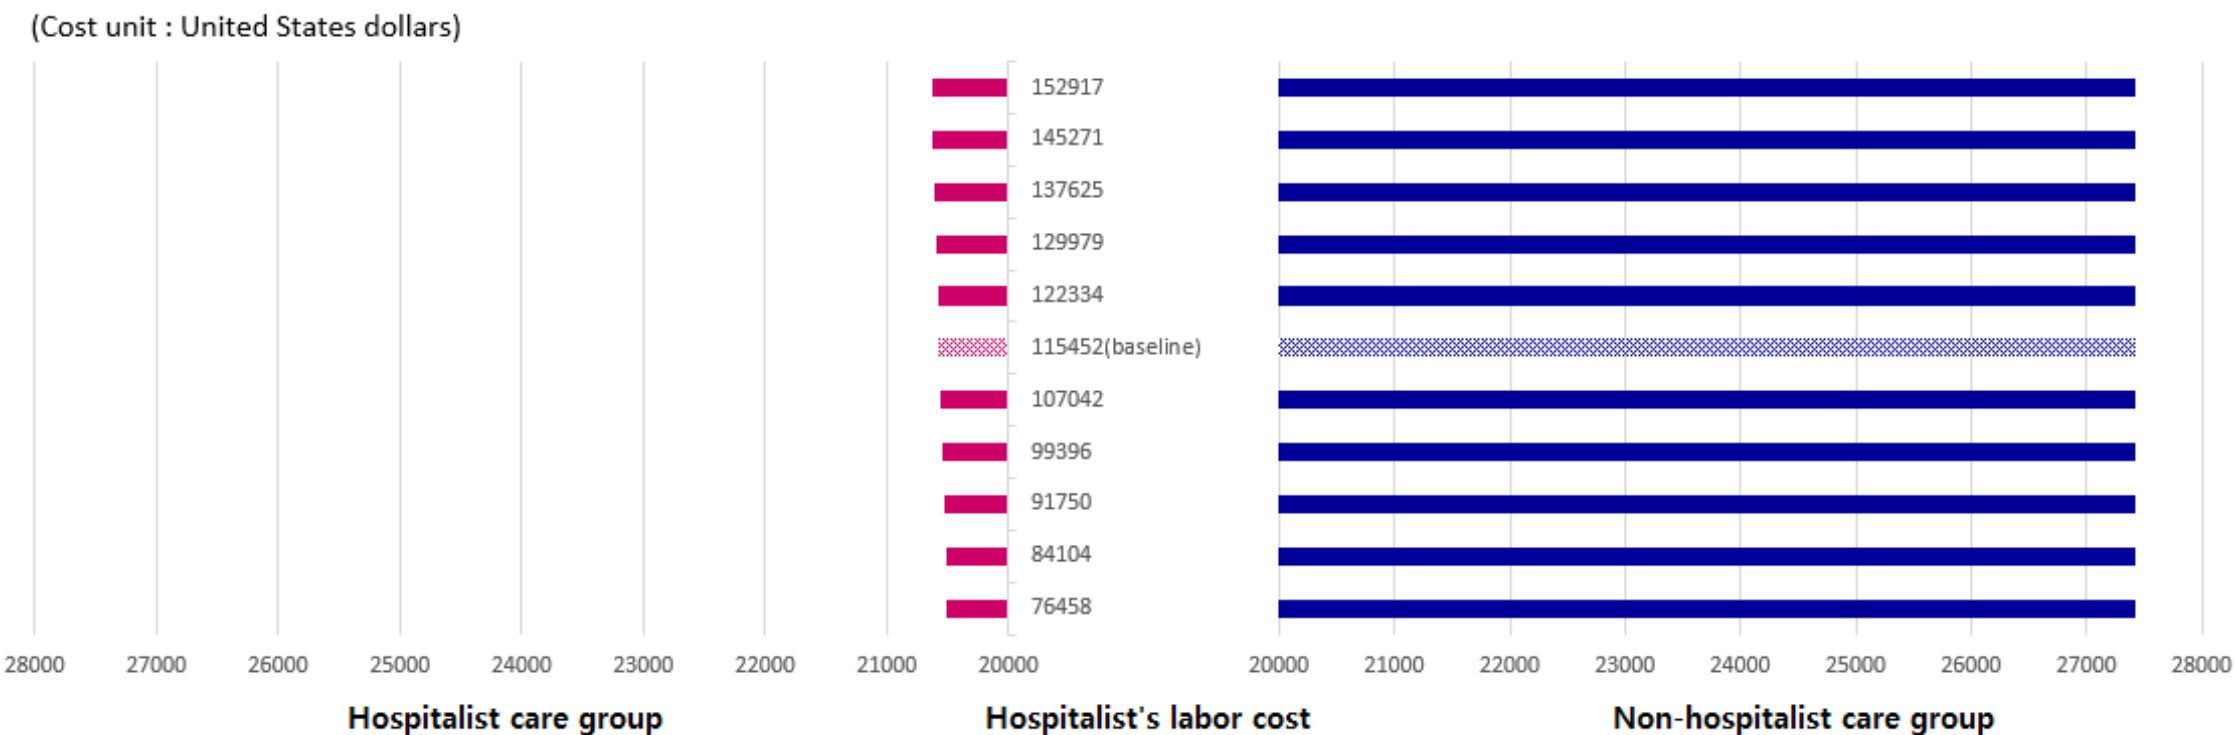

Total cost according to hospitalist labor cost

Supplementary 13. One-way sensitivity analysis for the hospitalist labor cost
