# Supplementary figures and images for: Economic evaluation of the hospitalist care model in an acute medical unit: a benefit–cost analysis
Source: HighWire-hosted journal article supplement (doi:10.1136/bmjopen-2023-081594), 2024-07-01

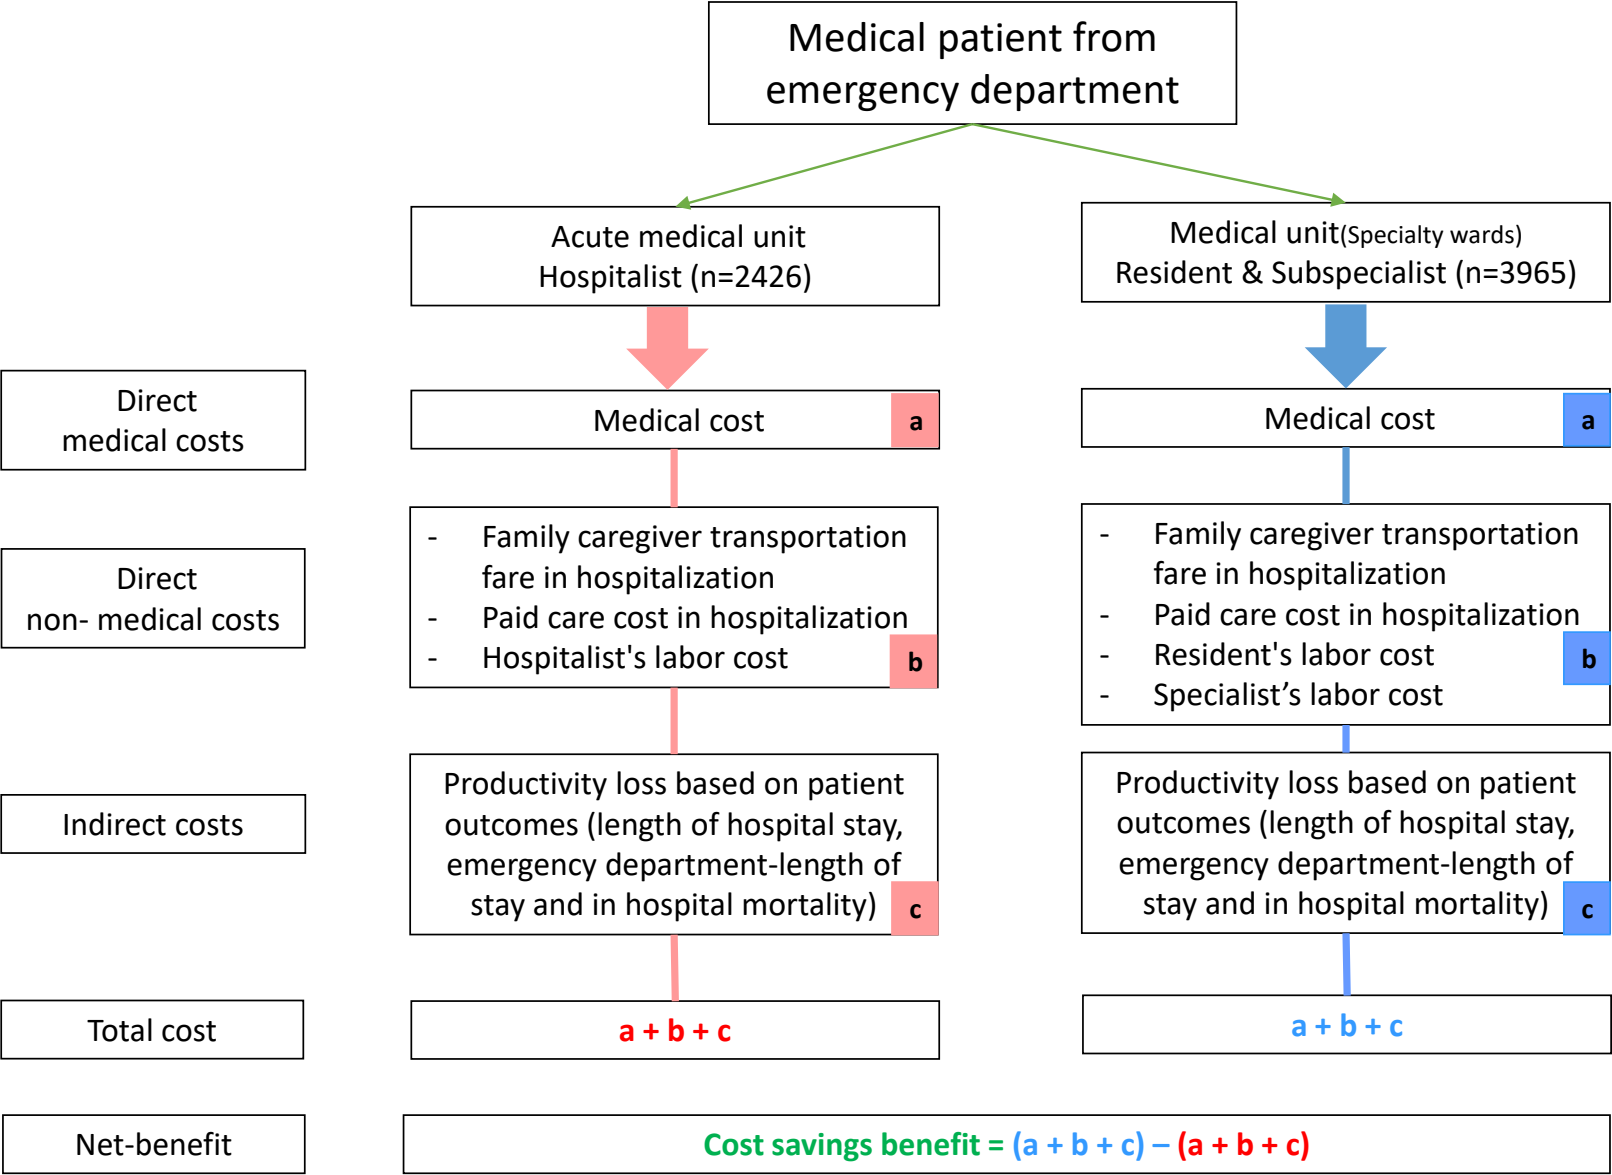

**Supplementary 1. Flow diagram of the study population and benefit-cost factors**

Supplement: bmjopen-2023-081594supp001_data_supplement.pdf [file bmjopen-2023-081594supp001_data_supplement.pdf]

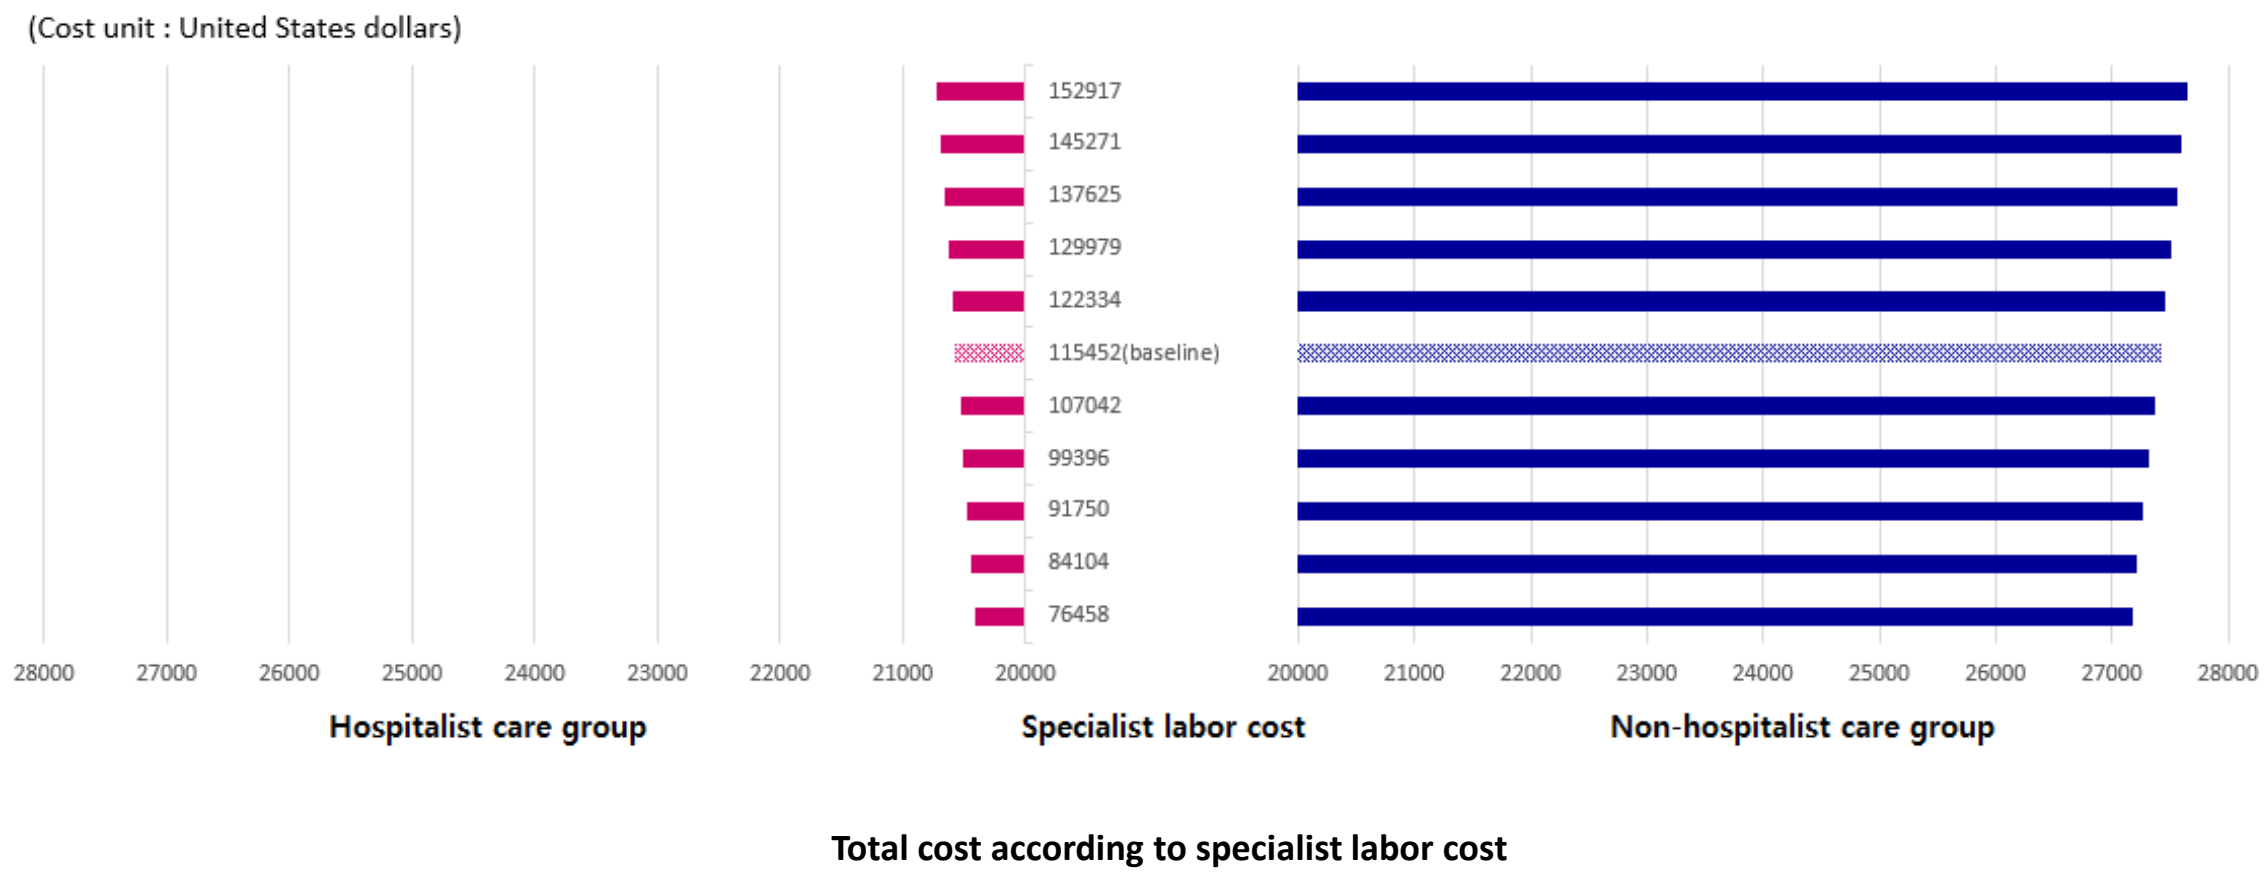

**Supplementary 12. One-way sensitivity analysis for the specialist labor cost**

Supplement: bmjopen-2023-081594supp012_data_supplement.pdf [file bmjopen-2023-081594supp012_data_supplement.pdf]

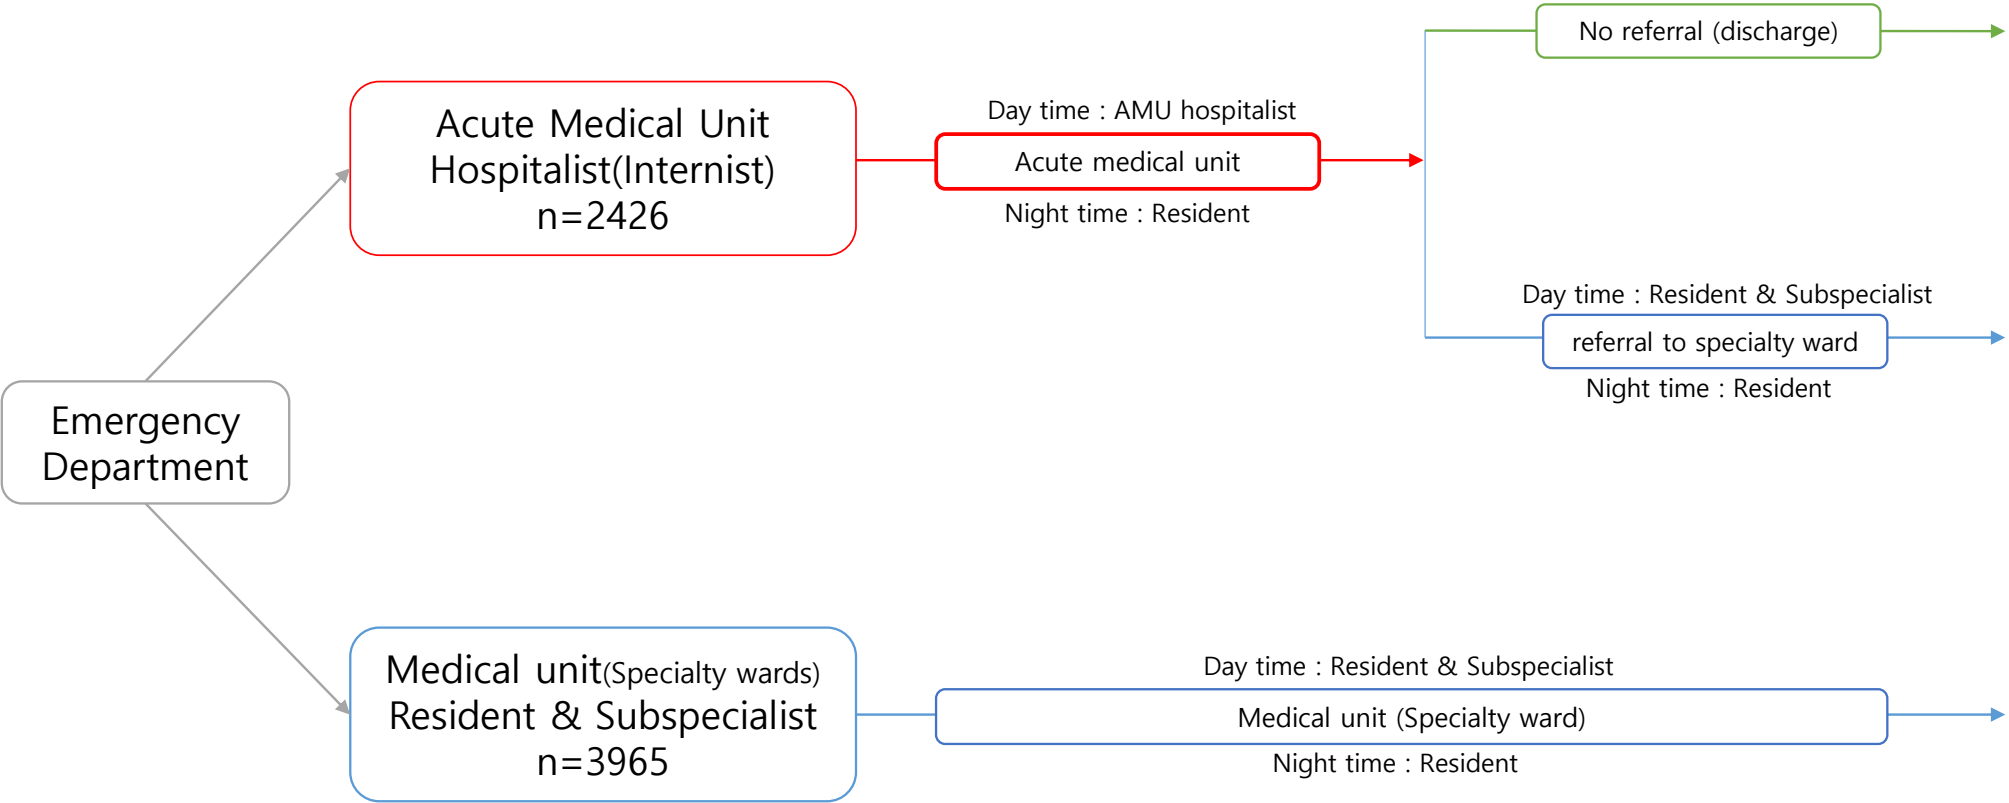

Supplementary 4. Doctor labor cost estimation by patients flow and timeline

Supplement: bmjopen-2023-081594supp004_data_supplement.pdf [file bmjopen-2023-081594supp004_data_supplement.pdf]
